# Supplementary material
Source: MDPI journal article supplement (https://www.mdpi.com/2073-445X/13/4/555)
Supplement: s1 [file s1 › land-2923714-supplementary.pdf]

# Validation of remotely sensed land surface temperature at Lake Baikal's surroundings using in-situ observations

Egor Dyukarev <sup>1,2,\*</sup>, Nadezhda Voropay <sup>1,3</sup> Oksana Vasilenko <sup>3</sup> and Elena Rasputina <sup>3</sup>

<sup>1</sup> Institute of Monitoring of Climatic and Ecological System SB RAS, Tomsk, 634055, Russia

<sup>2</sup> Yugra State University, Khanty-Mansiysk, 628012, Russia

<sup>3</sup> V. B. Sochava Institute of Geography SB RAS, Irkutsk, 664033, Russia, elenaistoma@gmail.com

\* Correspondence: dekot@mail.ru

---

**Supplementary S1. Photos of ground observation sites for in-situ temperature monitoring.**

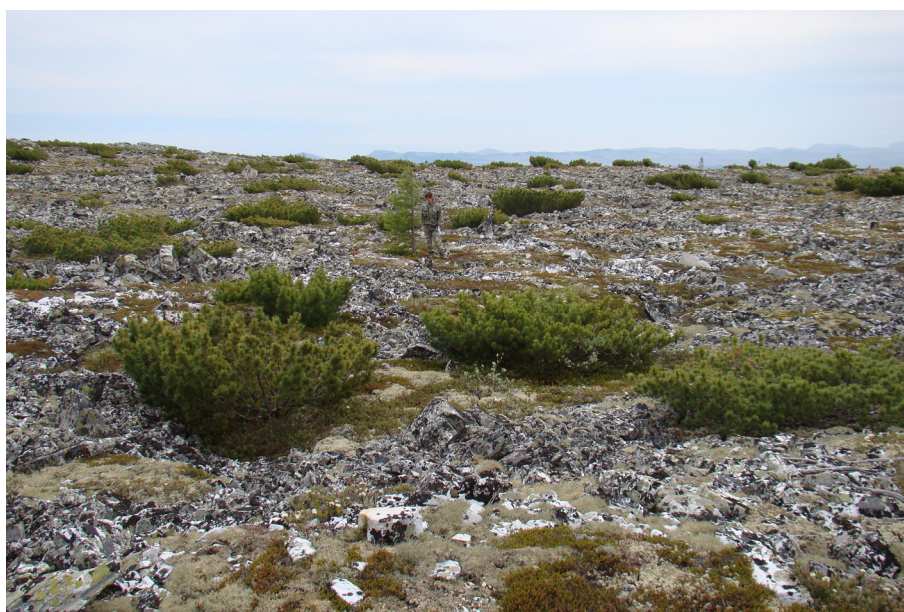

**Figure S1.** Site S1. Bare soil.

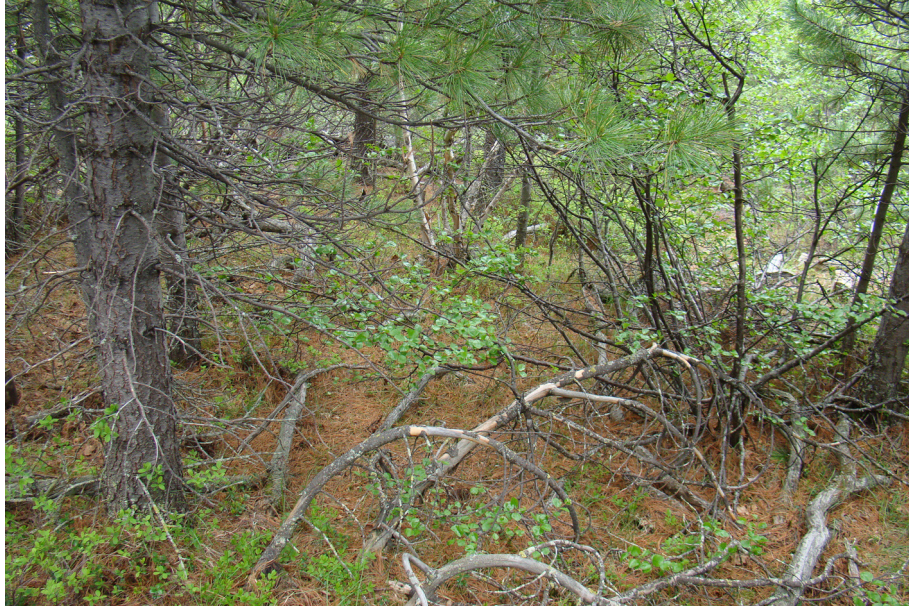

**Figure S2.** Site S2. Dark-coniferous forest.

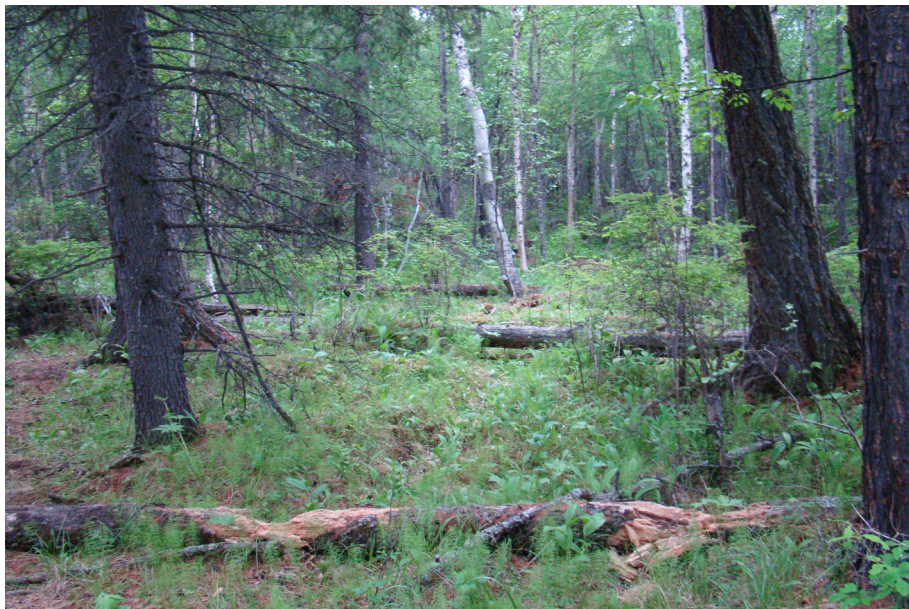

**Figure S3.** Site S3. Mixed forest.

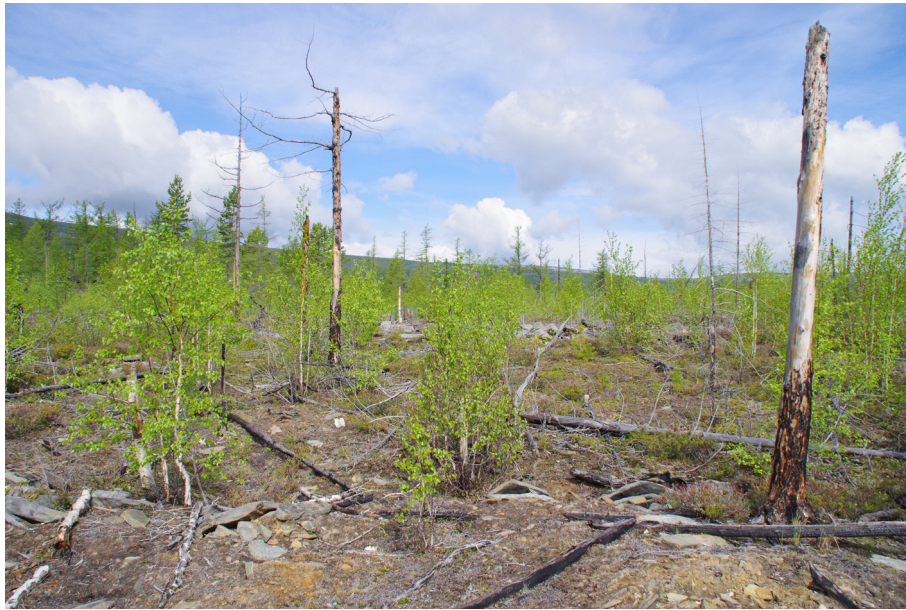

**Figure S4.** Site S4. Shrubs.

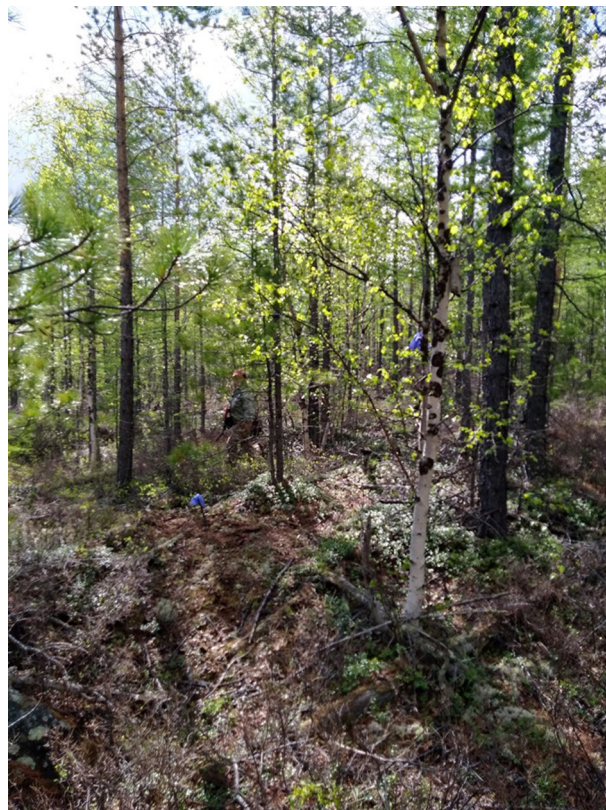

**Figure S5.** Site S5. Mixed forest.

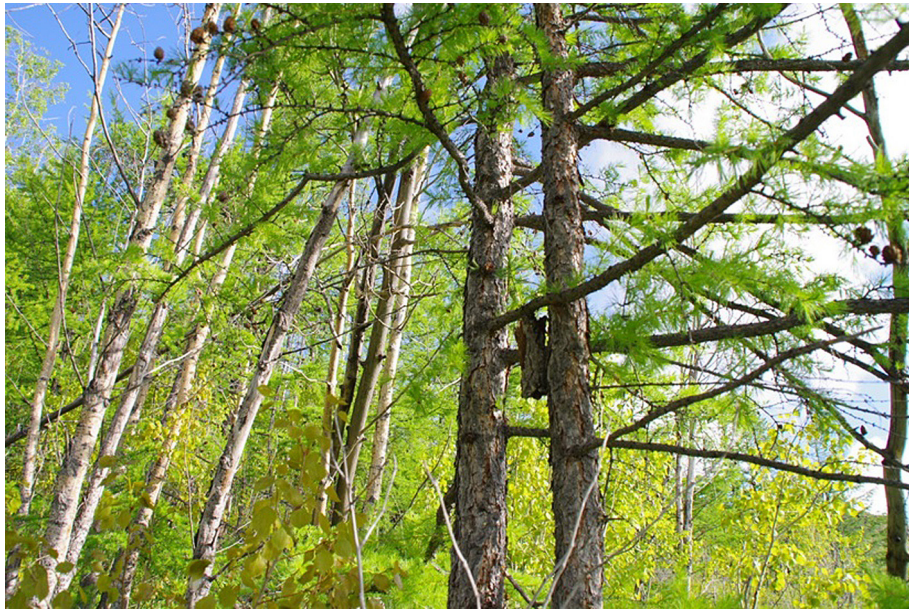

**Figure S6.** Site S6. Mixed forest.

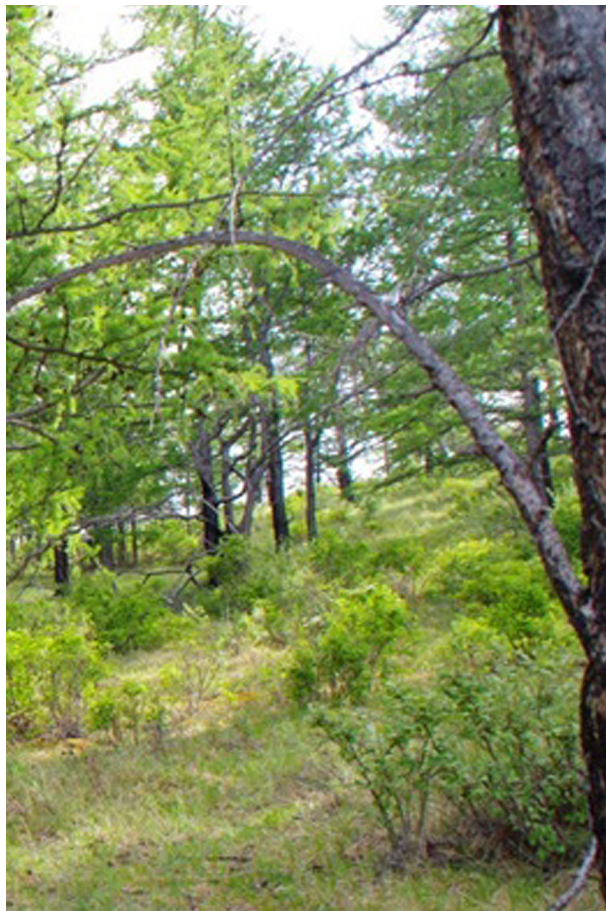

**Figure S7.** Site S7. Patches of larch forest.

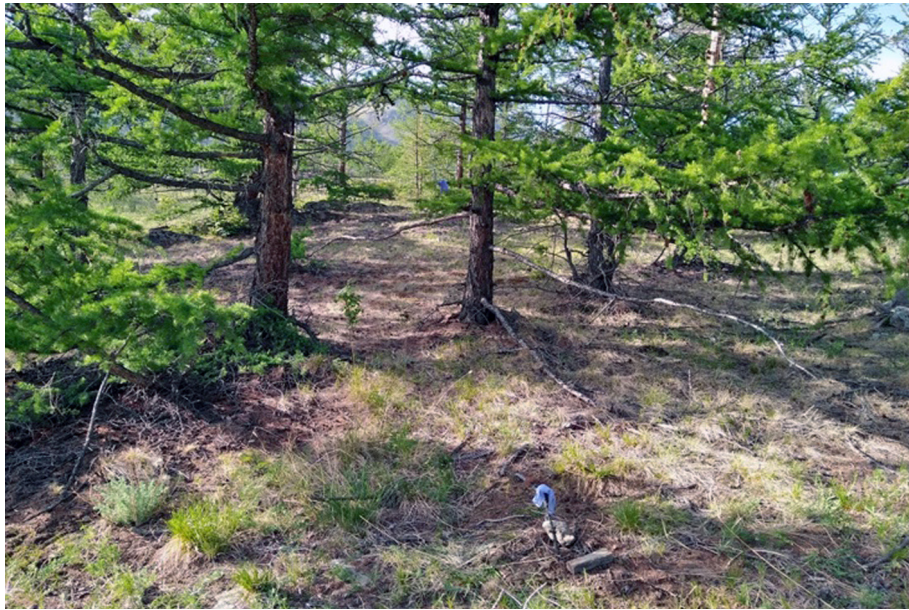

**Figure S8.** Site S8. Patches of larch forest.

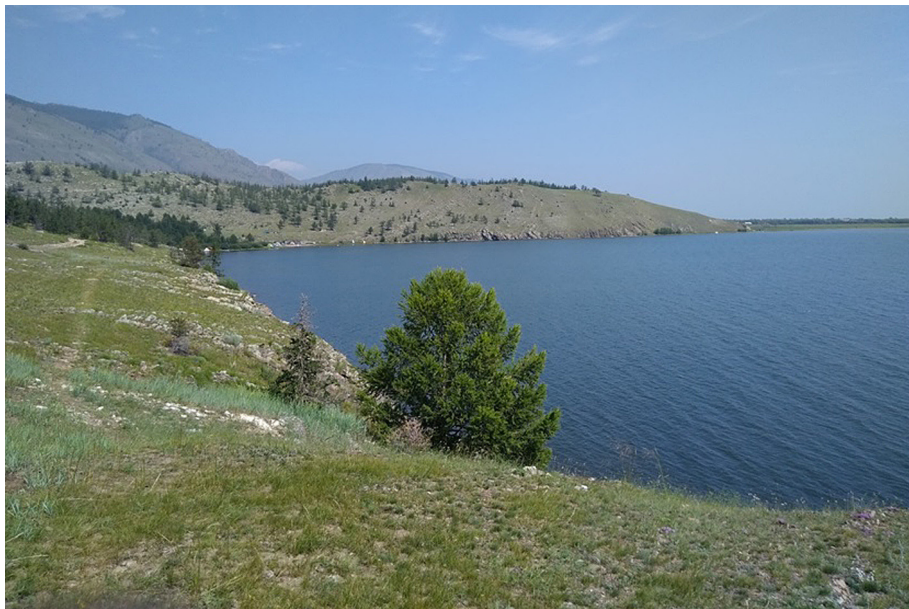

**Figure S9.** Site S9. Steppe.

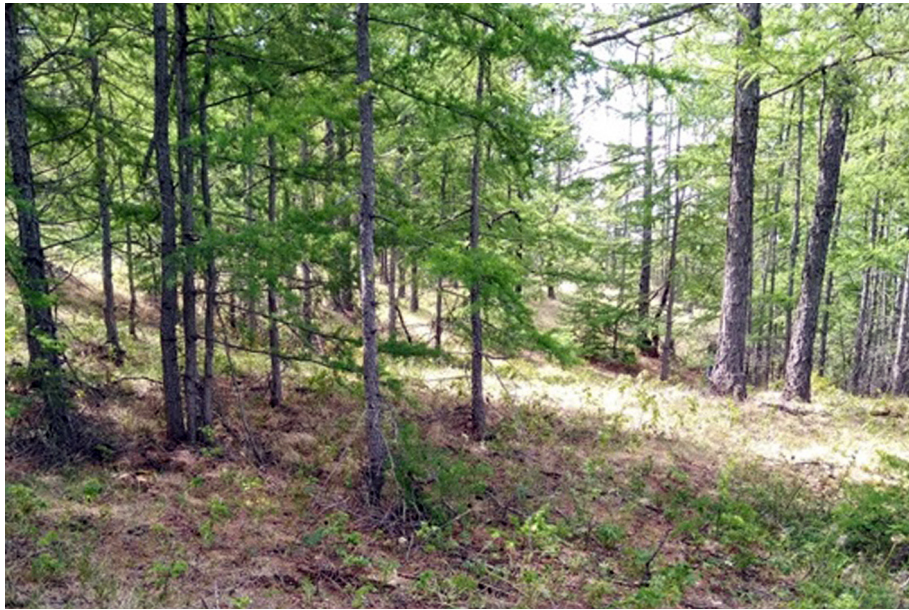

**Figure S10.** Site P1. Patches of larch forest.

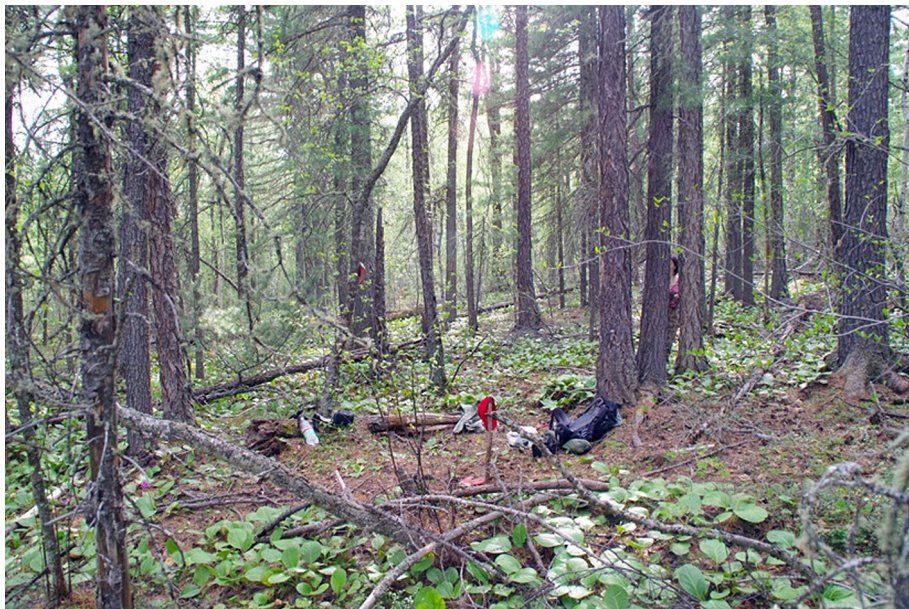

**Figure S11.** Site P2. Mixed forest.

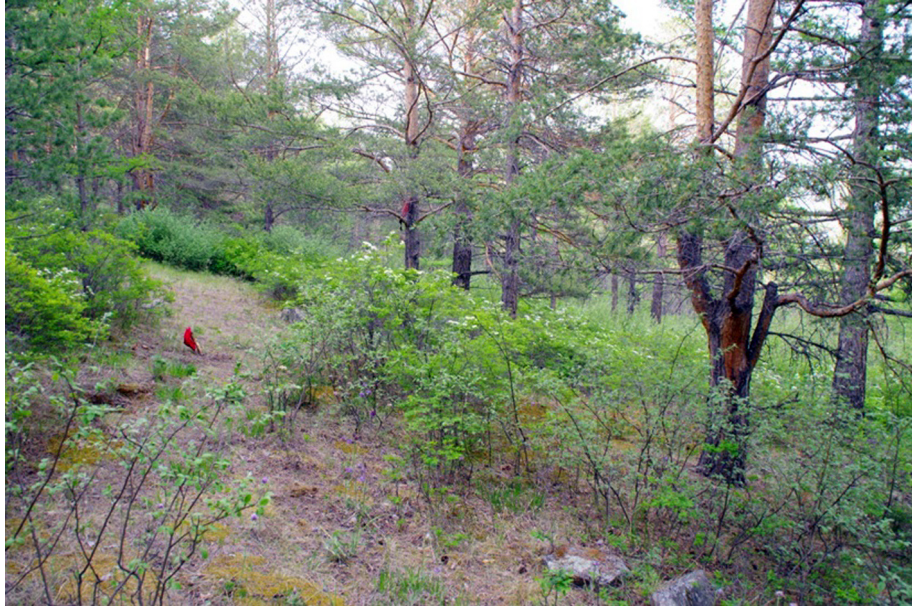

**Figure S12.** Site P3. Patches of pine forest.

**Supplementary S2. Photos of the equipment used for in-situ temperature monitoring.**

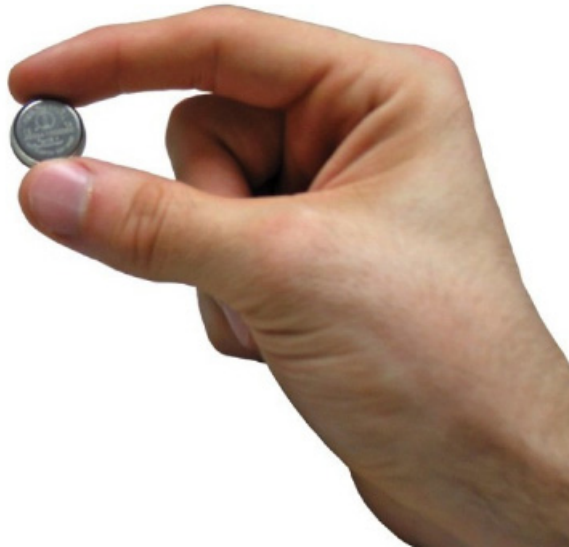

**Figure S13.** Thermochrone device picture (adopted from <https://www.templog.com.au/>, accessed on 9 February 2024)

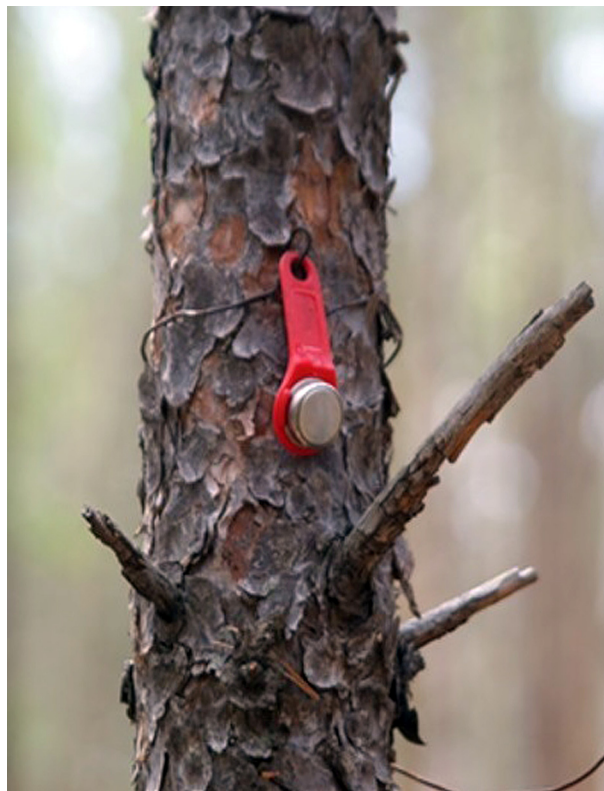

**Figure S14.** Thermochrone device mounted at north side of a pine tree at 2 m above surface for air temperature in-situ monitoring.

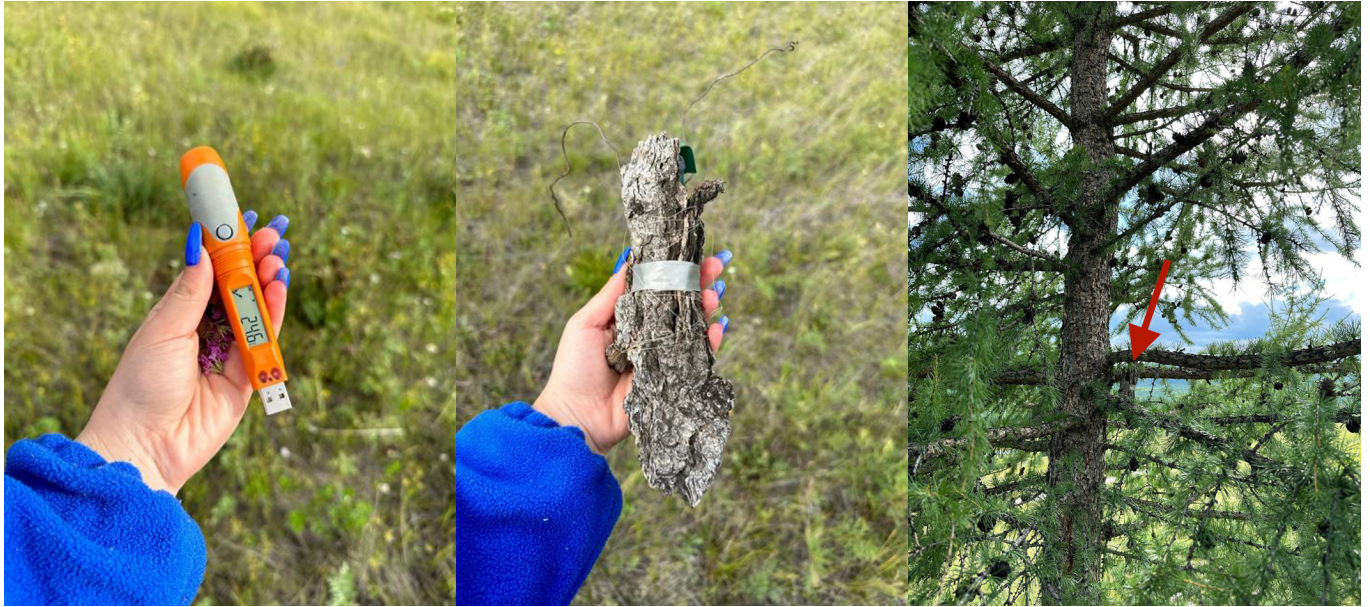

**Figure S15.** Elitech RC-51H temperature data logger used for air temperature monitoring (left), device covered by larch bark for hidden installation (center), device mounted at north side of a pine tree at 2 m above surface for air temperature in-situ monitoring (right).

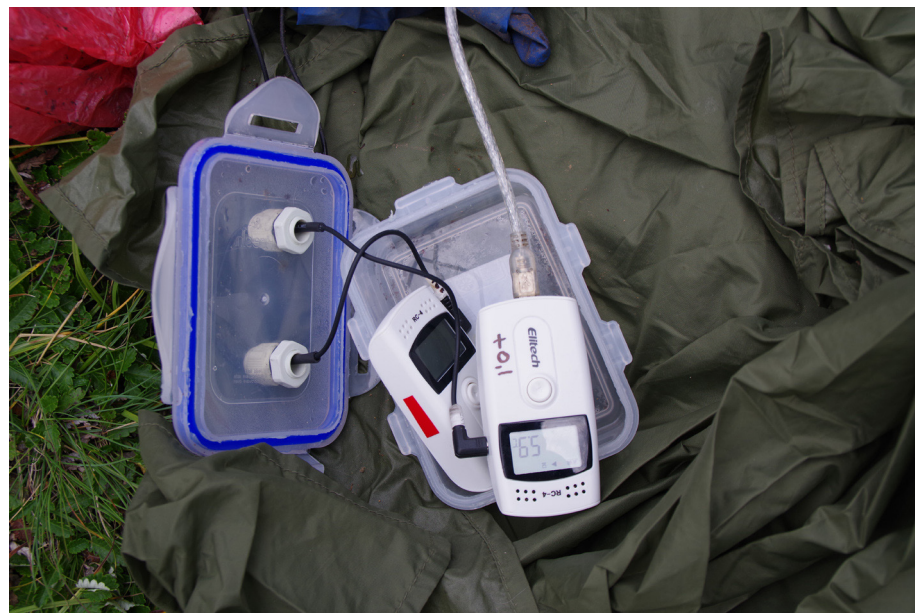

**Figure S16.** Elitech RC-4 temperature data logger with external temperature sensors located at waterproof box
